# Supplementary material
Source: Springer Nature journal article supplement (https://www.springermedizin.de/resource/supplementary/12936_2011_2051_MOESM11_ESM.pdf/9543416)

A

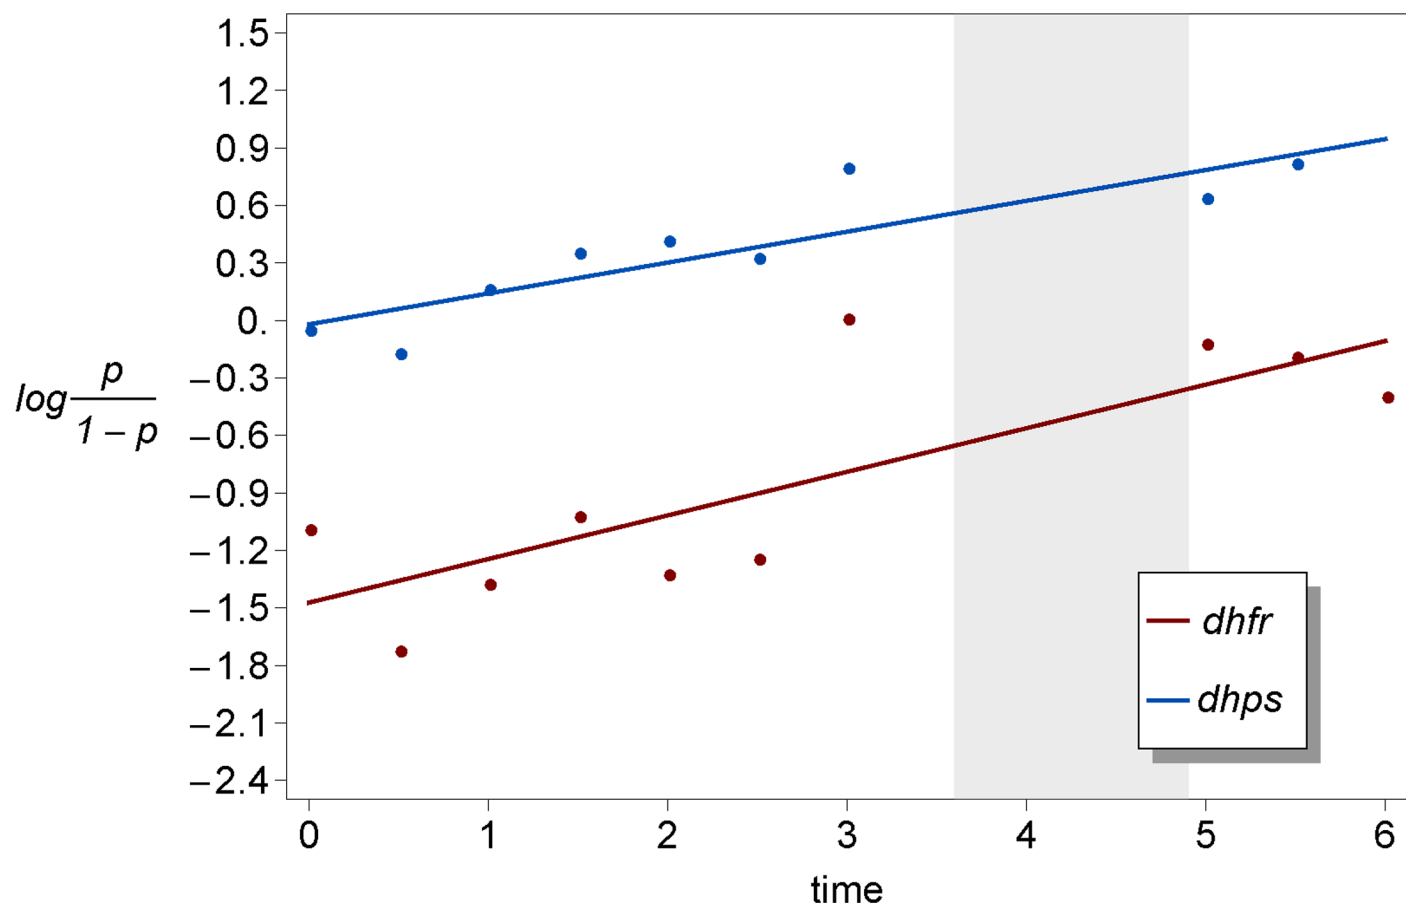

B

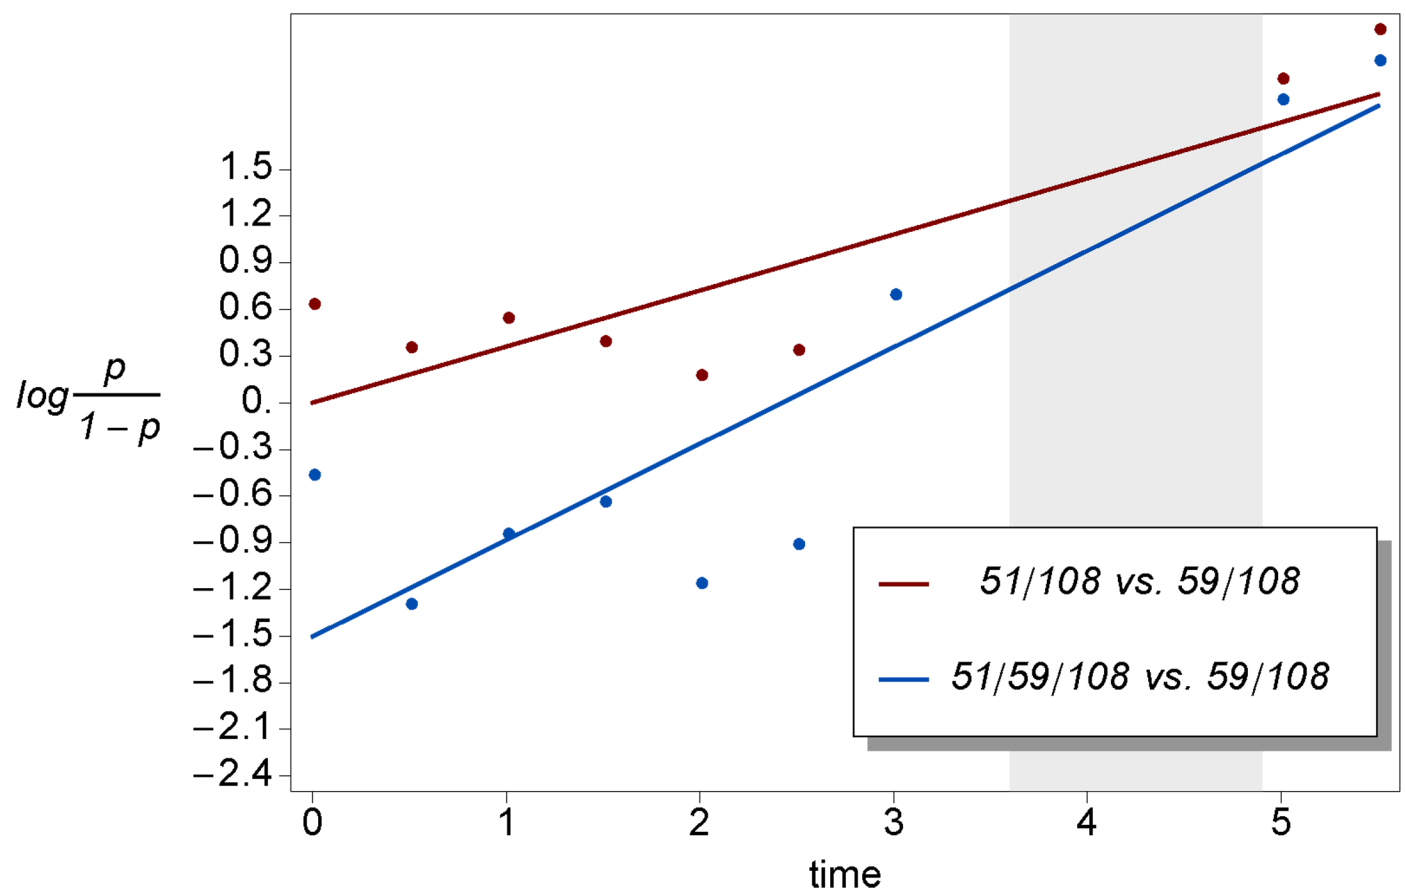

Supplement: MOESM11 [file 9543416]
